# Supplementary material
Source: PubMed Central journal article supplement (PMC1479878)
Supplement: tjp0570-0469-SupMat.pdf [file tjp0570-0469-SupMat.pdf]

## ***Glucokinase***

## ***SUR1***

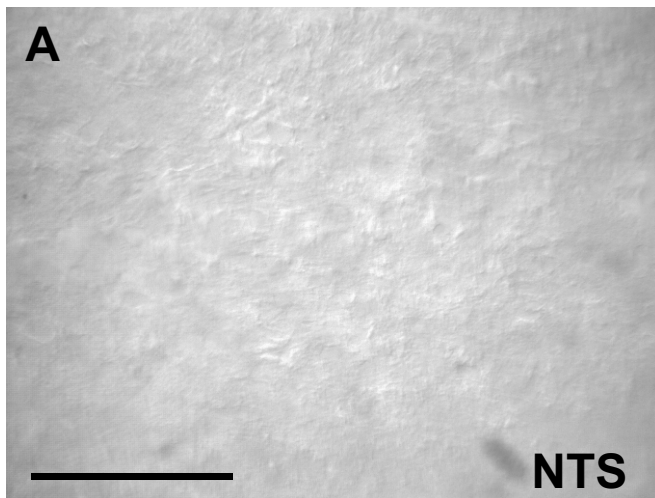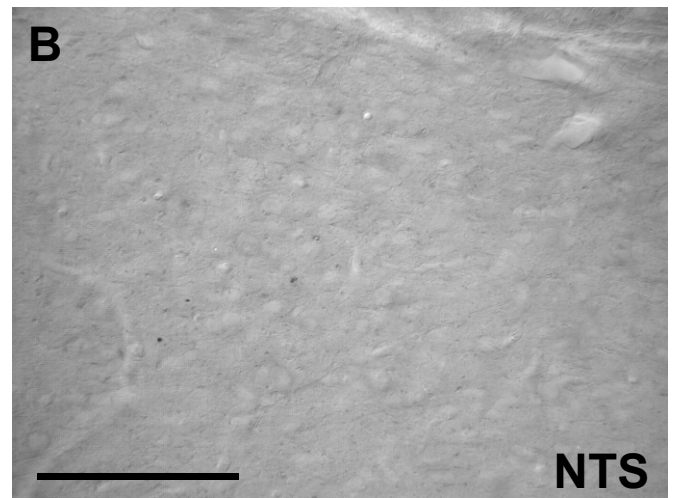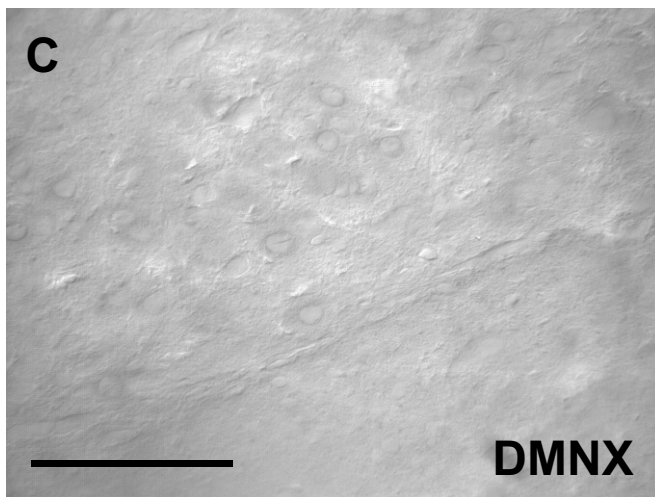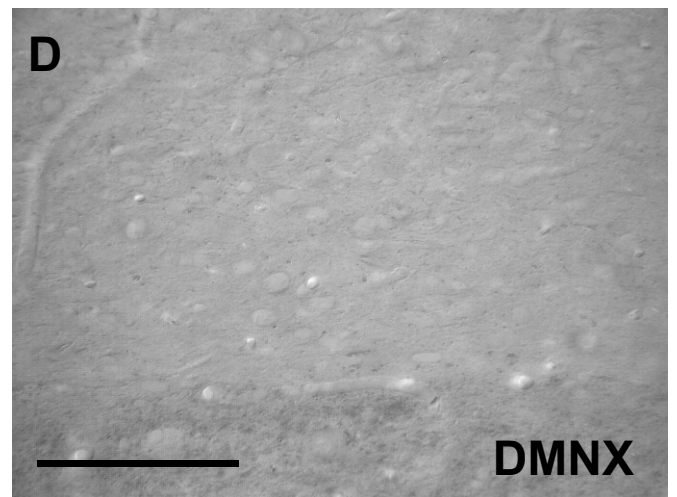

Hybridisation with sense riboprobes for GLK (**A,C**) and SUR1 (**B,D**). Photomicrographs (taken with DIC optics) of 30  $\mu$ m brainstem slices processed in parallel to those of Fig. 6. NTS: nucleus of the solitary tract; DMNX: dorsal vagal nucleus. Scale bars: 50  $\mu$ m.
